# Supplementary material
Source: PubMed Central journal article supplement (PMC2875160)
Supplement: NIHMS28871-supplement-2.pdf [file NIHMS28871-supplement-2.pdf]

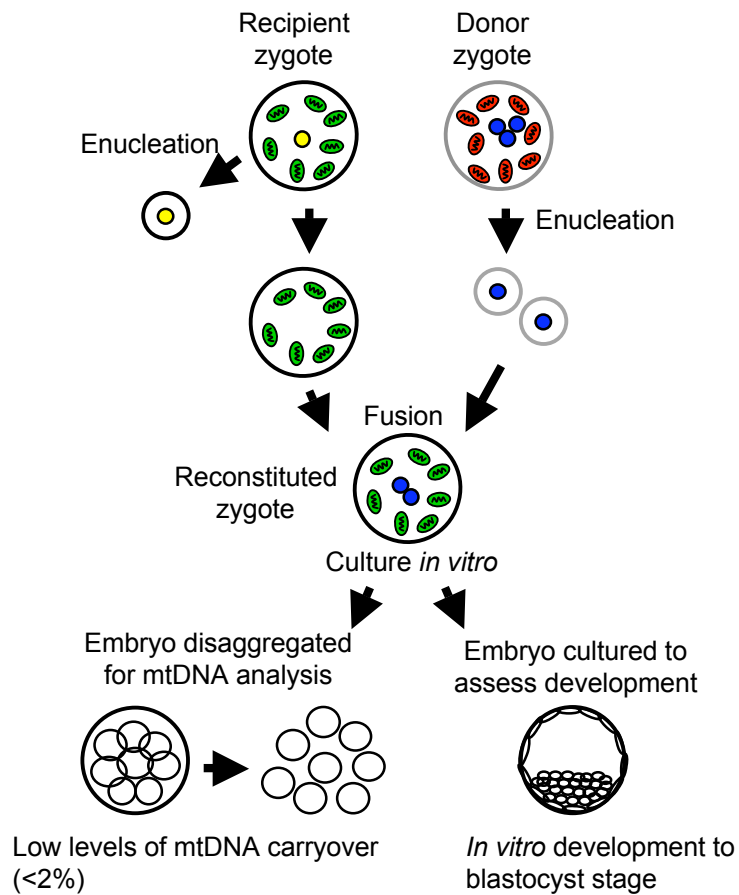

**Supplementary Figure 1. Schematic representation of pronuclear transfer in abnormally fertilised human embryos.** The main findings are potential development to blastocyst stage *in vitro* and very low levels of donor mtDNA carry over (<2%)

**Embryo 1**

|                            | D3S1358 | D16S539 | D8S1179 |
|----------------------------|---------|---------|---------|
| Recipient sperm            | 15/16   | 11/11   | 10/11   |
| Recipient follicular cells | 16/16   | 11/11   | 12/13   |
| Embryo                     | 14/16   | 12/12   | 14/14   |
| Donor sperm                | 14/16   | 11/12   | 13/14   |
| Donor follicular cells     | 14/16   | 11/12   | 13/14   |

**Embryo 2**

|                            | PentaD | D21S11  | PentaE | CSF1PO | D8S1179 |
|----------------------------|--------|---------|--------|--------|---------|
| Recipient sperm            | 9/11   | 28/32.2 | 10/16  | 10/12  | 13/13   |
| Recipient follicular cells | 10/14  | 30/30   | 10/11  | 10/14  | 12/15   |
| Embryo                     | 13/13  | 30/32   | 10/13  | 11/12  | 11/15   |
| Donor sperm                | 13/13  | 30/32   | 10/10  | 11/12  | 15/15   |
| Donor follicular cells     | 10/13  | 30/30   | 7/13   | 11/12  | 11/15   |

**Embryo 3**

|                            | D21S11    | TPOX  | FGA   |
|----------------------------|-----------|-------|-------|
| Recipient sperm            | 29/31.2   | 9/11  | 23/25 |
| Recipient follicular cells | 28/28     | 11/11 | 23/25 |
| Embryo                     | 29/31.2   | 8/8   | 22/22 |
| Donor sperm                | 29/31.2   | 8/8   | 20/22 |
| Donor follicular cells     | 31.2/31.2 | 8/8   | 22/25 |

**Supplementary Table 1. Informative microsatellite markers from ovarian follicular cells, sperm and pronuclear transfer embryos.** The nuclear genotype of ovarian follicular cells (maternal), sperm (paternal) and embryos was determined using the PowerPlex<sup>®</sup> 16 System. Informative markers are shown. Recipient samples are those parental samples for the embryo in which the pronucleus is removed as a karyoplast. Donor samples are those parental samples of the embryo which is the pronuclear donor. In the third embryo we were also able to analyse the removed karyoplast from the recipient embryo – only the D21S11 marker amplified and this marker was 28 confirming that we had removed the female pronucleus from the embryo.

| mtDNA sequence variant | Primer sequences (5' to 3')                                                                   | Annealing temperature | Restriction enzyme* | Product sizes (bp) |              |               |
|------------------------|-----------------------------------------------------------------------------------------------|-----------------------|---------------------|--------------------|--------------|---------------|
|                        |                                                                                               |                       |                     | Uncut              | Wildtype     | Mutant        |
| m.93A>G                | F TG <b>T</b> AAAACGACGGCCAGTcaccctattaacc <b>G</b> ctacg<br>R ttgaacgtaggtgcgataataat        | 60°C                  | <i>AciI</i>         | 180                | 30 + 150     | 30 + 64 + 86  |
| m.497C>T               | F gtatgcactttaacagtcacc<br>R ggggtgtctttgggittgg                                              | 61°C                  | <i>AciI</i>         | 159                | 27 + 44 + 88 | 44 + 115      |
| m.16126T>C             | F TG <b>T</b> AAAACGACGGCCAGTtacattactgccagccacca<br>R CAGGAAACAGCTATGACCgtggctttggagttgcagtt | 60°C                  | <i>HpyCH4V</i>      | 199                | 33 + 166     | 33 + 47 + 119 |
| m.16129G>A             | F attctcgttcttcatgggg<br>R gggtttgatgtggattggg                                                | 55°C                  | <i>KpnI</i>         | 171                | 37 + 53 + 81 | 37 + 134      |
| m.16519T>C             | F TG <b>T</b> AAAACGACGGCCAGTcagtcaaatcccttctcgtc<br>R gggaacgtgtggctatta                     | 60°C                  | <i>HaeIII</i>       | 223                | 91 + 132     | 31 + 60 + 132 |

F: forward; R: reverse. Primer M13-tails are listed in capital letters. Mismatch bases are highlighted in bold. \* Digests were performed overnight with 10U restriction enzyme.

### Supplementary Table 2. Hot last cycle PCR/RFLP assay conditions.
